# 1 **Systematic analysis of RNA-seq-based gene co-expression** 2 **across multiple plants**

3 Hua Yu<sup>a,b\*</sup>, Bingke Jiao<sup>a,b</sup>, Chengzhi Liang<sup>a,b\*</sup>

4 <sup>a</sup> State Key Laboratory of Plant Genomics, Institute of Genetic and Developmental Biology, Chinese Academy of  
5 Sciences

6 <sup>b</sup> University of Chinese Academy of Sciences, Beijing 100039, China

7 \* Corresponding author: Hua Yu, yuhua200886@163.com; cliang@genetics.ac.cn

8

## 9 **Abstract**

10 The complex cellular network was formed by the interacting gene modules. Building  
11 the high-quality RNA-seq-based Gene Co-expression Network (GCN) is critical for  
12 uncovering these modules and understanding the phenotypes of an organism. Here,  
13 we established and analyzed the RNA-seq-based GCNs in two monocot species rice  
14 and maize, and two eudicot species *Arabidopsis* and soybean, and subdivided them  
15 into co-expressed modules. Taking rice as an example, we associated these modules  
16 with biological functions and agronomic traits by enrichment analysis, and discovered  
17 a large number of condition-specific or tissue-specific modules. In addition, we also  
18 explored the regulatory mechanism of the modules by enrichment of the known  
19 cis-elements, transcription factors and miRNA targets. Their coherent enrichment with  
20 the inferred functions of the modules revealed their synergistic effect on the gene  
21 expression regulation. Moreover, the comparative analysis of gene co-expression was  
22 performed to identify conserved and species-specific functional modules across 4  
23 plant species. We discovered that the modules shared across 4 plants participate in the  
24 basic biological processes, whereas the species-specific modules were involved in the  
25 spatiotemporal-specific processes linking the genotypes to phenotypes. Our research  
26 provides the massive modules relating to the cellular activities and agronomic traits in  
27 several model and crop plant species.

28 **Key words: RNA-seq-based GCN, Agronomic Traits, Co-expressed Modules,**  
29 **Synergistic Effect, Functional Modules**

30

## 31 Introduction

32 The complex cellular network formed by the interacting macromolecules underlie an  
33 organism's phenotypes<sup>1-3</sup>. Biomolecules are often thought to organize into interacting  
34 modules (functional building blocks) for completing a specific biological process<sup>4-6</sup>.  
35 This standpoint is supported by the fact that many observable phenotypic variances  
36 are often not determined by a single gene but by a set of interacting genes<sup>7</sup>.  
37 Systematic reconstructing a complete map of these interacting molecular modules are  
38 crucial for understanding an organism's genetic architecture underlying phenotypes.

39 Several methods have been developed to find functional gene modules by utilizing  
40 transcriptome data. Differential Expression (DE) analysis uses traditional statistical  
41 hypothesis testing-based approach, such as t-test, F-test, ANOVA or negative binomial  
42 test for assessing statistical significance of an observed expression change of each  
43 individual gene by comparing the between-conditions variation and within-condition  
44 variation, which can reveal the genes related to specific experimental conditions or  
45 sample types<sup>8-10</sup>. However, differentially expressed genes are only a proxy for finding  
46 the key molecular modules related to our concerned biological questions because of  
47 highly dynamic transcriptome in different types of cells, tissues and experimental  
48 conditions<sup>11</sup>. Complementary with the DE analysis, differential gene co-expression  
49 analysis aims to identify a group of differently co-expressed genes under two or more  
50 conditions, which has been applied to discern condition-specific gene co-regulation  
51 patterns<sup>12-15</sup>. Differential co-expression analysis is especially effective in detecting  
52 biologically important genes that have less dramatic expression changes for certain  
53 conditions<sup>16,17</sup>. Other than the two methods above, bi-clustering analysis is an  
54 approach that performs simultaneous clustering on genes and conditions across a wide  
55 range of transcriptome experiments. This method can discern the groups of genes that  
56 demonstrate similar expression patterns underlying the specific conditions but behave  
57 independently under other conditions. Though bi-clustering can identify a broad set of  
58 overlapping modules and thus present a global perspective on transcriptional network,  
59 genome-wide application of this approach is generally hampered by its inherent high  
60 computational complexity<sup>18</sup>. Gene co-expression meta-analysis is another powerful  
61 method, which adopted the all experimental conditions to build co-expression network.  
62 When compared with bi-clustering analysis<sup>19-23</sup>, its simplicity make it a powerful tool  
63 for identifying transcriptional modules.

64 In this study, using the ensemble pipeline used to build the rice RNA-seq-based Gene  
65 Co-expression Network (GCN) (unpublished method, under review), we further built  
66 the RNA-seq-based GCN in one monocot species of maize and two eudicot species of  
67 *Arabidopsis* and soybean and delineate them into co-expressed modules. Taking rice

68 as an example, we associated the modules with biological functions and agronomic  
69 traits, and found a large number of condition-specific and tissue-specific modules. In  
70 addition, we also investigated the transcriptional regulatory mechanisms of modules  
71 by integrating known *cis*-element, transcription factors and miRNA targets. Moreover,  
72 we performed the comparative analysis of co-expressions across the 4 plant species to  
73 find the conserved and species-specific functional modules. Our research revealed the  
74 massive gene modules associating with the cellular activities and agronomic traits in  
75 several model and crop plant species, which provides a valuable data source for plant  
76 genetics research and breeding.

## 77 Results

### 78 Topological and biological properties of RNA-seq-based GCNs

79 The topological and biological properties of 4 RNA-seq-based GCNs built using the  
80 ensemble inference pipeline were analyzed. All these networks show the small-world  
81 characteristic with an average path length between any two nodes are smaller than 7  
82 (Table S2). The distributions of node degrees obey the truncated power-laws where  
83 most nodes have a few co-expression partners with only a small ratio of hub nodes  
84 associating with a large number of partners (Fig.S1). We found that hub genes (with  
85 degree >200) were more functionally diversified than random ones in all four species  
86 (Wilcoxon rank sum test,  $p$ -value=8.46E-3 for *Arabidopsis*,  $p$ -value=6.23E-4 for rice,  
87  $p$ -value=1.18E-7 for maize and  $p$ -value=2.20E-4 for soybean). This indicated that the  
88 hub genes of the co-expression networks might not be necessary to participate in  
89 central biological functions but provide the cross talks between different biological  
90 processes<sup>24</sup>. On the other hand, we found that the likelihood of a gene to be essential  
91 increases with its degree, betweenness and closeness centrality, and they were more  
92 conserved across all plants (Fig.S2-S5). The negative correlation between the degrees  
93 ( $K$ ) and the clustering coefficients ( $C$ ) of genes revealed hierarchical and modular  
94 natures of these networks and the possible synergistic regulation of gene expression  
95 (Fig.S6)<sup>21</sup>.

### 96 Function and synergistic regulation of rice co-expression modules

97 One important feature of co-expression network is the modular structure, with genes  
98 sharing more connections within the module than between the modules. We adopted  
99 the Markov CLustering (MCL) method to obtain 772 gene co-expression modules (the  
100 number of genes > 5) in rice (Dataset 3). Of these modules, 771 modules are enriched  
101 in GO terms, pathways, protein functional domains or Tos17 mutant phenotypes. We  
102 found that the genes in co-expression modules shared more similar biological roles

103 than the random selected genes (Wilcoxon rank sum test,  $p$ -value = 5.06E-07). Based  
104 on the enriched functions and gene expression patterns, we selected 12 gene modules  
105 participating in fundamental and condition-specific processes for further analysis (see  
106 Supplementary Text, Dataset 4, Dataset 5, Fig.S7-Fig.S10 for details). Among them, 5  
107 gene modules are involved in photosynthesis; 4 modules are related to development of  
108 the reproductive organs, 2 modules were associated with cell cycle regulation and 2  
109 modules were related to stress responses. For example, we found that two modules  
110 showing the pollen specific expression patterns (Fig.1) include a large amount of  
111 genes involving in the cell division, pollen germination, pollen tube growth and pollen  
112 sperm cell differentiation (Dataset 6).

113 The expression of a gene is often controlled by multiple factors such as transcription  
114 factors and miRNAs<sup>25</sup>. Here, we further explored the regulation mechanisms of the  
115 co-expressed modules. We found known *cis*-elements in 770 modules, and found that  
116 208 modules were enriched with targets of the same microRNAs and 291 modules  
117 were enriched with genes co-expressed with the common transcription factors. We  
118 also observed that the pairs of genes within co-expression modules, on average, have  
119 more common transcription factors and target genes of the same microRNAs than  
120 pairs of genes within random modules (Wilcoxon rank sum test,  $p$ -value=2.49E-28 for  
121 transcription factor and  $p$ -value=2.94E-28 for microRNA target). All these results  
122 suggested that the transcription factors or microRNAs tend to coordinately regulate  
123 targets sharing similar biological functions.

124 We found many examples in which the modules were simultaneously regulated by  
125 multi-factors. The most obvious example is the Module #5 involved in cell cycle and  
126 floral organ development, whose genes were linked together by two TCP transcription  
127 factors (*LOC\_Os11g07460* and *LOC\_Os02g42380*), one CPP transcription factors  
128 (*LOC\_Os03g43730*) and three miRNAs (*osa-miR396*, *osa-miR156* and *osa-miR529*)  
129 (Fig.2 and Dataset 7). *LOC\_Os11g07460* was co-expressed with 69 genes, in which  
130 34 genes were associated with cell cycle, cell proliferation, cell differentiation, floral  
131 organ development and other development processes. Similarly, *LOC\_Os03g43730*  
132 was connected with 51 genes, 25 of these genes were associated with cell cycle and  
133 plant development processes. And *LOC\_Os02g42380* was associated with 41 genes,  
134 in which 19 genes involving in cell division and floral organ development. We found  
135 that 22 genes were associated with at least two of three key transcription factors  
136 mentioned above; of these genes, 16 genes play important roles in cell division, cell  
137 proliferation, cell differentiation and floral organ development. Moreover, we found  
138 that 3 genes were linked to three transcription factors above simultaneously, i.e.  
139 *LOC\_Os11g07460*, *LOC\_Os02g42380* and *LOC\_Os03g43730*. These three genes

140 were involved in flower morphogenesis, post-embryonic development and meristem  
141 growth. In addition to the transcription factors, the target genes of osa-miRNA156,  
142 osa-miRNA396 and osa-miRNA529 were also captured and enriched in the same  
143 module. Two of these three miRNAs (osa-miRNA156 and osa-miRNA396) play  
144 important roles in the cell division and organ development of the *Arabidopsis thaliana*  
145 <sup>26-28</sup>. The common target *LOC\_Os08g39890* of osa-miRNA156 and osa-miRNA529  
146 was co-expressed with *LOC\_Os07g03250*, which was related to the reproduction and  
147 development processes and was linked to two key transcription factors described  
148 above (*LOC\_Os03g43730* and *LOC\_Os11g07460*) and one MADS-box family gene.  
149 These results showed that synergistic regulation of co-expressed modules by multiple  
150 transcription factors and miRNAs.

151 Furthermore, for the 12 modules mentioned above, we observed the strong coherence  
152 among the enriched transcription factors; known motifs and the enriched functions of  
153 modules (see Supplementary Text and Dataset 4 for details). For example, we found  
154 that two DBB transcription factors, 3 G2-like transcription factors and 5 CO-like  
155 transcription factors were tightly co-expressed with genes of photosynthesis modules  
156 (Table 1). In addition, 18 known *cis*-regulatory elements involving in light regulation  
157 are also enriched in these modules (Table 2). In another instance, we observed that the  
158 TCP, CPP and E2F/DP family of transcription factors are strongly linked to cell cycle  
159 modules (Table 2). And the known cell cycle motifs of E2FCONSENSUS, E2FAT and  
160 E2FANTRNR are also enriched (Table 2). For the pollen-specific modules, M-type  
161 transcription factors are tightly linked, and three known cell cycle *cis*-elements  
162 E2FCONSENSUS, E2FANTRNR and E2FAT were enriched (Table 1 and Table 2). In  
163 terms of stress response modules, WRKY, MYB, NAC and ERF transcription factors  
164 are linked with them. And three known stress response elements WBOXATNPR1,  
165 MYB1AT and ELRECOREPCR1 are enriched (see Table 1 and Table 2). The less  
166 prevalent miRNA target enrichment in modules indicates that the biological functions  
167 of miRNAs and their target genes were diversified under evolution <sup>29</sup>. Though the  
168 enrichment of miRNA targets in modules is infrequent, the roles of miRNAs and their  
169 targets can be inferred by the enriched functions of modules.

## 170 **Co-expression modules controlling rice important agronomic traits**

171 We asked whether the genes associating with common agronomic traits were placed  
172 and enriched in the co-expression modules. Interestingly, we found genes relating to  
173 the same agronomic traits were co-placed in the common modules (Table 3), which is  
174 consistent in functions with the agronomic trait. Firstly, it is expected that Module #7  
175 whose genes were enriched in the agronomic traits of source activity. Secondly,

176 Module #5 and Module #10 (modules participating in cell cycle) contain a large  
177 number genes relating to the agronomic traits of sterility and dwarf. Thirdly, genes  
178 associated with the agronomic trait of panicle flower were enriched in the Module #30.  
179 In addition, we also found that both Module #1 and Module #6 (containing the large  
180 number of pathogenesis-related transcription factors) whose genes were enriched in  
181 the agronomic traits relating to various resistances. Interestingly, we observed a  
182 module related to physiological trait of eating quality, and genes in this module were  
183 involved in starch biosynthesis, which is consistent with the fact that the component  
184 and molecular structure of starch are correlated with rice eating quality<sup>30,31</sup>. These  
185 obtained results suggested that genes controlling the same agronomic traits were  
186 intrinsically clustered together in the network. According to the ranking of the number  
187 of links with known agronomic trait genes, we selected top 10 candidate biochemical  
188 function known and unknown genes associated with the dwarf, source activity,  
189 sterility and eating quality from Module #5, Module #7, Module #10 and Module #33,  
190 respectively. Indeed, some of these genes are likely associated with the agronomic  
191 traits, according to their molecular functions, which can provide guidance for future  
192 molecular breeding (Dataset 8). Particularly, we also observed that two QTL/GWAS  
193 candidate genes of *LOC\_Os07g10495* and *LOC\_Os10g42299*, related to leaf length,  
194 width, perimeter and area were placed in Module #7<sup>32</sup>. As annotated in MSU project,  
195 these two genes are highly expressed in leaf and seedling relative to other tissues, and  
196 is the molecular components of plastid. Moreover, we also found that a QTL/GWAS  
197 candidate gene *LOC\_Os02g37850* associated with the spikelet fertility control were  
198 located in Module #10, this gene was involved in cell cycle and highly expressed  
199 reproductive organs of pistil and inflorescence<sup>33</sup>.

## 200 **Comparative analysis of co-expression networks across multiple** 201 **plants**

202 We performed a comparative analysis of gene co-expression networks across multiple  
203 plants to identify conserved and species-specific co-expressed functional modules  
204 across closely related or distant plant species. We first examined to what extent the  
205 co-expressions are conserved among species. Indeed, a significant proportion of the  
206 pairs of genes whose co-expressions are conserved between the different plants (see  
207 Supplementary Text, Table S3, Table S4, Table S5, Dataset 9 and Dataset 10 for  
208 details). As demonstrated in Fig.3, we can observe that the co-expressions are more  
209 conservative within monocotyledons or dicotyledons than between monocotyledons  
210 and dicotyledons. In addition, using the co-expression neighbors-based inference<sup>34</sup>,  
211 we also found that the predicted functions of orthologous genes between species are  
212 more consistent than the random control genes (see Table S6 for details).

213 To analyze and compare the functional groups of these co-expression networks, we  
214 subdivided the network of each species into co-expressed functional modules based  
215 on co-expression link density and functional annotation similarity (for details, see  
216 Materials and Methods section). As a result, we here obtained 1396, 975, 1115 and  
217 1065 modules for rice, *Arabidopsis*, maize and soybean, respectively. To assess the  
218 quality and reliability of obtained modules, we calculated for each real module the  
219 fraction of genes that own at least one homologue in a second species and compared  
220 with random modules. As expected, we found that the most modules have either  
221 significantly less or more homologous genes in other species than the random  
222 modules (Fig.4 and Table S7).

223 We next focused on identifying the conserved functional modules sharing homologous  
224 genes across species and species-specific functional modules without homologous  
225 genes, based on the enrichment analysis of orthology relationships between genes for  
226 each combination of functional modules between four plants (see Materials and  
227 Methods for details). We defined a conserved module as one having homologous  
228 modules in at least one of the other species. Modules with no homologue module in  
229 all other plants are considered as species-specific. We identified 735 highly conserved  
230 modules among all four species (Dataset 11) and 2942 less conserved modules shared  
231 only by 3 or 2 plant species. Fig.5 demonstrated the common enriched GO terms of  
232 the functional modules within conserved modules. As expected, most of the common  
233 enriched GO terms are related to basic biological process, such as DNA replication,  
234 nucleosome assembly, RNA metabolic process, tricarboxylic acid cycle and cellulose  
235 synthetic process. We found that 62 best match of conserved module pairs (the  
236 percentage of homologous genes between two modules > 30%) with the common  
237 enriched GO terms, 48 module pairs enriched the same known motifs (length  $\geq$  6bp)  
238 in at least two species. In addition to the conservative modules, we also found 874  
239 species-specific functional modules (Dataset 12). We observed that some species-  
240 specific functional modules whose genes are enriched in response to abiotic stresses,  
241 hormone stimuli and signal transduction, indicating a strong link between regulatory  
242 evolution and environmental adaptation. These results indicate that while a large  
243 amount of modules have been conserved under evolution, each species include more  
244 recently evolved modules linking genotype with phenotype.

245 To describe the conserved and species-specific modules in details by examples, we  
246 further analyzed the inter-species conservation of 4 rice co-expression subnetworks as  
247 described in our previous literature (unpublished paper, under review) involving in  
248 cell wall metabolism, cell cycle, floral organ development and stress response process.  
249 We extended the single-species subnetworks into multi-species subnetworks by

250 utilizing co-expression links within species and orthology relationships between genes  
251 across species. Note that we built the cross-species subnetwork involved in floral  
252 organ development process by expanding *AP3*-guide (an *Arabidopsis* homolog of rice  
253 *MADS16*) subnetwork, since genes in the *MADS16*-guide subnetwork have too few  
254 homologs in other plants. As expected, we observed that co-expressions are strongly  
255 conserved across all plants for cell wall metabolism and cell cycle processes  
256 (Fig.S11-S12). In contrast, the co-expressions in the subnetworks involving in stress  
257 response and flower development process were relatively less conserved between  
258 different plants (Fig.S13-S14).

## 259 Discussion

260 In this study, we comparatively analyzed the high-quality RNA-seq-based gene  
261 co-expression networks and modules of 4 plant species: *Arabidopsis*, rice, maize and  
262 soybean, which were obtained by applying the pervious ensemble pipeline on the  
263 large amount of public available RNA-seq data (several hundred to more than one  
264 thousand samples for each plant species). The analysis of the topology properties of  
265 networks demonstrate that, for all these plants, the degree frequency distributions  
266 follow the truncated power-law; genes with high degree, betweenness and closeness  
267 tend to be essential and conserved between species; and network structure is highly  
268 modular. We also observed that the functionally related genes are often tightly  
269 connected together and the co-expression links are frequently conserved across the  
270 plant networks. The conserved and species-specific functional modules were  
271 identified using both the clustering analysis and orthology relationships enrichment of  
272 genes between different plant species. On one hand, the conserved modules across all  
273 plants provide an invaluable source for biological gene discovery and functional  
274 annotation transfer among different plants. On the other hand, a substantial ratio of  
275 modules has no significant conservation, indicating that novel genetics modules have  
276 been formed to accommodate the specific lifestyle and environment conditions. The  
277 similarity and difference of the modules between plants reveal the robustness and  
278 plasticity of gene regulatory networks. It is quite remarkable that some species-  
279 specific modules were enriched in the basic biological functions. For example, an  
280 *Arabidopsis* specific module of C8F1 plays important role in cell wall metabolism. It  
281 is interesting that the genes included in this module have no homologs in other plants.  
282 Similarly, five *Arabidopsis* chloroplast genome modules of C12F5, C12F7, C12F9,  
283 C12F11 and C12F12 involving in photosynthesis whose genes almost have no  
284 homologous genes in other plants. This result might be due to incorrect functional  
285 annotations of the genes and incomplete genome sequences.



286 Complementary with the co-expression neighborhood-based function prediction, the  
287 modules provide a valuable alternative for hypothesis-driven function inference of  
288 genes. The biological functions of uncharacterized genes in a given module could be  
289 inferred using the enriched functions of the modules. In addition, the conservative  
290 modules could be used to find functional analogous genome elements between species  
291 but their sequence have been diverged beyond recognition<sup>35</sup>. Moreover, the conserved  
292 modules can also inherently remove the orthologs with similar sequence but not share  
293 similar biological functions, in contrast to sequence-based functional annotation<sup>21</sup>.

294 Although co-expression between genes can be used to predict the gene functions, it is  
295 restricted to infer interactions where the regulators are co-expressed with their targets  
296 since it can only reveal the regulation of transcription level. Besides, co-expression  
297 network cannot also distinguish the regulators that are actually regulated a gene from  
298 ones that are simply co-expressed with a gene. We analyzed the regulatory mechanism  
299 of the modules by integrating the known motifs, transcription factor and microRNA  
300 targets. The outcomes demonstrated the strong agreements between the enriched  
301 known motifs, transcription factor, microRNAs and the enriched functions of modules.  
302 This agreement can be applied to infer the new regulatory interactions between the  
303 regulators and their targets.

## 304 Materials and methods

### 305 Experimental datasets

306 We downloaded the RNA-seq samples of rice, *Arabidopsis*, maize and soybean from  
307 the NCBI Sequence Read Archive (see Dataset 1 and 2 for details, accessed on May  
308 29, 2014) using the same method as our previous study (reference). After the  
309 Sequence Read Archive (SRA) files were obtained, we transformed them into the  
310 FASTQ format using SRA Analysis Toolkit. The FASTQ sequencing reads files were  
311 firstly trimmed using Trimmomatic software (version 0.32)<sup>36</sup> with a parameter of the  
312 minimum read length at least 70% of the original size. Then, the `fastq_quality_filter`  
313 program included in FASTX Toolkit was used to further filtrate low quality reads,  
314 with the minimum quality score 10 and minimum percent of 50% bases that have a  
315 quality score larger than this cutoff value. The reads aligning and gene expression  
316 estimation were carried out by our previous analysis pipeline (reference). For  
317 *Arabidopsis*, maize and soybean, we used the TAIR10, Maizeb73v2 and Gmax\_189  
318 reference genomes for mapping and gene expression calculation. Gene Ontology (GO)  
319 annotations for all four plants were downloaded from the Plant GeneSet Enrichment  
320 Analysis Toolkit (PlantGSEA)<sup>40</sup>. We extracted the biological pathways from three  
321 data sources including PlantGSEA, Gramene<sup>29</sup> and Plant Metabolic Network (PMN)

322 database (<http://pmn.plantcyc.org/>). We obtained KEGG pathways from PlantGSEA  
323 for rice, *Arabidopsis* and soybean. Subsequently, we extracted the signaling and  
324 metabolic pathways in OryzaCyc, AraCyc, and SoyCyc databases from the PMN  
325 project data portal. With regard to maize, we integrated the pathway information  
326 retrieved from CornCyc database (contained in PMN project data portal) and  
327 MaizeCyc database (included in Gramene database). Besides, we also extracted the  
328 rice InterPro annotations from MSU Rice Genome Annotation Project website  
329 (<http://rice.plantbiology.msu.edu/>). The known agronomic trait genes were collected  
330 from the Q-TARO database <sup>41</sup> and literatures. Essential genes of *Arabidopsis* were  
331 retrieved from SeedGenes database <sup>42</sup>. The known *cis*-regulatory motifs were  
332 extracted from both AGRIS and PLACE databases <sup>43,44</sup>. Transcription factor families  
333 for all these plants were downloaded from the Plant Transcription Factor Database  
334 (PlantTFDB) <sup>45</sup>. MicroRNAs and their related targets were collected from the Plant  
335 MicroRNA Target Expression database (PMTED) and Plant MicroRNA database  
336 (PMRD) <sup>46</sup>. The orthologs between species were obtained by integrating the results of  
337 BLASTP alignment (with E-value < 1E-160), the predictions of OrthoMCL <sup>47</sup> and the  
338 known gene families provided in MSU Rice Genome Annotation Project.

### 339 **Module identification and enrichment analysis**

340 A two-step decomposition procedure was adopted to identify the modular structure.  
341 We first divided the whole network into co-expression modules using an efficient  
342 graph clustering algorithm of Markov Clustering (MCL) with the default parameters  
343 (co-expression modules with the number of genes  $\geq 5$  were remained for subsequent  
344 analysis). Because the obtained co-expression modules might consist of hundreds of  
345 genes with numerous functional terms and multiple functional units, we carried out a  
346 second step to further subdivide the initial co-expression modules into non-redundant  
347 functional modules using functional annotation similarity clustering. Our clustering  
348 procedure adopted the Kappa statistics which is similar to the method used in <sup>48</sup>, but  
349 with two important modifications. In details, a pair-wise Kappa *K* score was first  
350 calculated for each gene using the following equations:

$$351 \quad K = \frac{P(A) - P(E)}{1 - P(E)} \quad (2)$$

352 Where  $P(A)$  is the percentage agreement of functional terms between the gene pair,  
353 and  $P(E)$  represents the chance agreement. For rice, the GO, pathway, InterPro and  
354 Tos17 mutant phenotypes were combined as the functional terms. For *Arabidopsis*,  
355 maize and soybean, the GO and pathways were integrated as the functional terms.  
356 Based on the Kappa statistics, a seed cluster was formed for each gene by grouping it

357 with all other genes with which it shares a  $K$  score greater than a given threshold. To  
358 obtain an appropriate threshold, we simulated 10000 background distributions of  $K$   
359 score by randomly sampling 1000 genes from the genome space and used the average  
360 95th percentile of these distributions as the  $K$  score threshold. Seed clusters with less  
361 than 3 genes were not considered. Also, seed clusters were only considered if 50% or  
362 more of the  $K$  scores between all group members were greater than the given  
363 threshold. Subsequently, the seed clusters were merged through an iterative process  
364 that exhaustively compared each cluster with every other group and merge any two  
365 that have more than 50% similarity. It continued until merging was no longer possible  
366 and the remaining clusters were treated as the functional modules. As many genes in  
367 the networks do not have the functional annotation, we adopted a procedure to assign  
368 these genes to the obtained functional modules. For each unannotated gene within a  
369 given co-expression module, we counted its connections with the genes of the  
370 functional modules derived from the co-expression module. Then, we selected the  
371 functional modules with the maximal links and moved the unannotated gene to these  
372 functional modules. This process continued until all unannotated genes were pushed  
373 to the functional modules. Note that we did not divide the co-expression modules with  
374 the number of annotated genes less than 3, and they were directly regarded as the  
375 functional modules. Functional modules were named after as follows: CxFy, where  $x$   
376 is the number of co-expression module and  $y$  is the number of cluster. Note, for the  
377 very large co-expression modules cannot be subdivided into functional within 30 days  
378 using the in-house script, we further decomposed the sub-network composed of genes  
379 contained in each of these modules into smaller co-expression modules using different  
380 inflate parameters so that the co-expression modules can be effectively divided into  
381 functional modules.

382 The function, phenotype, known cis-regulatory motif and miRNA target enrichment  
383 of a module was calculated as the ratio of the relative occurrence in gene set of the  
384 module to the relative occurrence in the genome. To find known cis-regulatory motifs  
385 within each module, the promoter region (1kbp upstream from the transcription start  
386 site) of each gene in each module and entire genome was scanned for each known  
387 motifs. For each transcription factor, the enrichment of module was based on the ratio  
388 of the relative occurrences of genes co-expressed with the transcription factor between  
389 module and co-expression network. The statistical significance level was calculated  
390 using Fisher's exact test. The  $p$ -value smaller than 0.05 was regarded as enriched.

### 391 **Modules conservation analysis**

392 To identify the conserved and specie-specific functional modules, the number of

393 homologs pairs for the given two species was counted for each combination of the  
394 functional modules. The number of homologues pairs was then compared to the  
395 expected number based on the hypergeometric test,

$$396 \quad P(X = x \geq q) = \sum_{x=q}^n \frac{\binom{k}{x} \binom{n-k}{m-x}}{\binom{n}{m}} \quad (3),$$

397 where  $q$  represented the number of orthologous pairs in combination of functional  
398 modules between the given two species,  $k$  was the total number of orthologous pairs  
399 between the given two species,  $m$  denoted the number of all possible gene pairs in  
400 the combination of functional modules between the given two species, and  $n$   
401 presented the number of all possible gene pairs between the given two species. To as  
402 soon as possible obtain the true conserved modules and remove the false positives (e.g.  
403 produced by large plant gene families having many-to-many orthologs), the obtained  
404  $p$ -values were further adjusted by the Benjamini-Hochberg correction for multiple  
405 hypotheses testing. Only the combinations with the  $q$ -value smaller than 0.05 were  
406 considered as homologous. Based on this, the conserved modules were defined as one  
407 having homologous modules in at least one of the other species. Modules with no  
408 homologue modules in all other plants are treated as species-specific. The enriched  
409 GO terms of modules were visualized using the tool REVIGO<sup>49</sup>.

## 410 **Availability**

411 The reconstructed RNA-seq-based co-expression networks and functional modules of  
412 4 plant species can be freely downloaded at <ftp://111111@ftp.mbkbase.org> (username:  
413 111111; password: 111111).

## 414 **References**

- 415 1 Vidal, M., Cusick, M. E. & Barabasi, A.-L. Interactome networks and human disease. *Cell*  
416 **144**, 986-998 (2011).
- 417 2 Kitano, H. Computational systems biology. *Nature* **420**, 206-210 (2002).
- 418 3 Kitano, H. Systems biology: a brief overview. *Science* **295**, 1662-1664 (2002).
- 419 4 Segal, E. *et al.* Module networks: identifying regulatory modules and their  
420 condition-specific regulators from gene expression data. *Nat. Genet.* **34**, 166-176 (2003).
- 421 5 Hartwell, L. H., Hopfield, J. J., Leibler, S. & Murray, A. W. From molecular to modular  
422 cell biology. *Nature* **402**, C47-C52 (1999).
- 423 6 Mitra, K., Carvunis, A.-R., Ramesh, S. K. & Ideker, T. Integrative approaches for finding  
424 modular structure in biological networks. *Nat. Rev. Genet.* **14**, 719-732 (2013).
- 425 7 Strohman, R. Maneuvering in the complex path from genotype to phenotype. *Science* **296**,  
426 701-703 (2002).
- 427 8 Cui, X. & Churchill, G. A. Statistical tests for differential expression in cDNA microarray  
428 experiments. *Genome Biol.* **4**, 210 (2003).
- 429 9 Anders, S. & Huber, W. Differential expression analysis for sequence count data. *Genome*

- 430 *Biol.* **11**, R106 (2010).
- 431 10 Robinson, M. D., McCarthy, D. J. & Smyth, G. K. edgeR: a Bioconductor package for  
432 differential expression analysis of digital gene expression data. *Bioinformatics* **26**,  
433 139-140 (2010).
- 434 11 Windram, O. *et al.* Arabidopsis defense against *Botrytis cinerea*: chronology and  
435 regulation deciphered by high-resolution temporal transcriptomic analysis. *Plant Cell* **24**,  
436 3530-3557 (2012).
- 437 12 Gambardella, G. *et al.* Differential network analysis for the identification of  
438 condition-specific pathway activity and regulation. *Bioinformatics* **29**, 1776-1785 (2013).
- 439 13 Ma, C., Xin, M., Feldmann, K. A. & Wang, X. Machine Learning-Based Differential  
440 Network Analysis: A Study of Stress-Responsive Transcriptomes in Arabidopsis. *Plant*  
441 *Cell* **26**, 520-537 (2014).
- 442 14 Amar, D., Safer, H. & Shamir, R. Dissection of regulatory networks that are altered in  
443 disease via differential co-expression. *PLoS Comput. Biol.* **9**, e1002955 (2013).
- 444 15 Cai, J. *et al.* Modeling co-expression across species for complex traits: insights to the  
445 difference of human and mouse embryonic stem cells. *PLoS Comput. Biol.* **6**, e1000707  
446 (2010).
- 447 16 Elo, L. L., Järvenpää, H., Orešič, M., Lahesmaa, R. & Aittokallio, T. Systematic  
448 construction of gene coexpression networks with applications to human T helper cell  
449 differentiation process. *Bioinformatics* **23**, 2096-2103 (2007).
- 450 17 Southworth, L. K., Owen, A. B. & Kim, S. K. Aging mice show a decreasing correlation  
451 of gene expression within genetic modules. *PLoS Genet* **5**, e1000776 (2009).
- 452 18 Ihmels, J. *et al.* Revealing modular organization in the yeast transcriptional network.  
453 *Nature Genet.* **31**, 370-377 (2002).
- 454 19 Ma, S., Shah, S., Bohnert, H. J., Snyder, M. & Dinesh-Kumar, S. P. Incorporating motif  
455 analysis into gene co-expression networks reveals novel modular expression pattern and  
456 new signaling pathways. *PLoS Genet.* **9**, e1003840 (2013).
- 457 20 Stuart, J. M., Segal, E., Koller, D. & Kim, S. K. A gene-coexpression network for global  
458 discovery of conserved genetic modules. *Science* **302**, 249-255 (2003).
- 459 21 Bergmann, S., Ihmels, J. & Barkai, N. Similarities and differences in genome-wide  
460 expression data of six organisms. *PLoS Biol.* **2**, e9 (2003).
- 461 22 Mutwil, M. *et al.* PlaNet: combined sequence and expression comparisons across plant  
462 networks derived from seven species. *Plant Cell* **23**, 895-910 (2011).
- 463 23 Gerstein, M. B. *et al.* Comparative analysis of the transcriptome across distant species.  
464 *Nature* **512**, 445-448 (2014).
- 465 24 Heyndrickx, K. S. & Vandepoele, K. Systematic identification of functional plant modules  
466 through the integration of complementary data sources. *Plant Physiol.* **159**, 884-901  
467 (2012).
- 468 25 Hobert, O. Gene regulation by transcription factors and microRNAs. *Science* **319**,  
469 1785-1786 (2008).
- 470 26 Wu, G. *et al.* The sequential action of miR156 and miR172 regulates developmental  
471 timing in Arabidopsis. *Cell* **138**, 750-759 (2009).
- 472 27 Wu, G. & Poethig, R. S. Temporal regulation of shoot development in Arabidopsis  
473 thaliana by miR156 and its target SPL3. *Development* **133**, 3539-3547 (2006).
- 474 28 Rodriguez, R. E. *et al.* Control of cell proliferation in Arabidopsis thaliana by microRNA  
475 miR396. *Development* **137**, 103-112 (2010).
- 476 29 Cuperus, J. T., Fahlgren, N. & Carrington, J. C. Evolution and functional diversification  
477 of MIRNA genes. *The Plant Cell* **23**, 431-442 (2011).
- 478 30 Jin, L. C. *et al.* Correlation between components and molecule structure of rice starch and  
479 eating quality. *Jiangsu Journal of Agricultural Sciences* **1**, 004 (2011).
- 480 31 Umemoto, T. *et al.* Effects of variations in starch synthase on starch properties and eating  
481 quality of rice. *Plant Prod. Sci.* **11**, 472-480 (2008).
- 482 32 Yang, W. N. *et al.* Genome-wide association study of rice (*Oryza sativa* L.) leaf traits with  
483 a high-throughput leaf scorer. *Journal of Experimental Botany* **66**, 5605-5615,  
484 doi:10.1093/jxb/erv100 (2015).
- 485 33 Kumar, V. *et al.* Genome-wide association mapping of salinity tolerance in rice (*Oryza*  
486 *sativa*). *DNA Research* **22**, 133-145, doi:10.1093/dnares/dsu046 (2015).

- 487 34 Vandepoele, K., Quimbaya, M., Casneuf, T., De Veylder, L. & Van de Peer, Y. Unraveling  
488 transcriptional control in Arabidopsis using cis-regulatory elements and coexpression  
489 networks. *Plant Physiol.* **150**, 535-546 (2009).
- 490 35 Yan, K.-K. *et al.* OrthoClust: an orthology-based network framework for clustering data  
491 across multiple species. *Genome Biol* **15**, R100 (2014).
- 492 36 Bolger, A. M., Lohse, M. & Usadel, B. Trimmomatic: a flexible trimmer for Illumina  
493 sequence data. *Bioinformatics*, btu170 (2014).
- 494 37 Trapnell, C., Pachter, L. & Salzberg, S. L. TopHat: discovering splice junctions with  
495 RNA-Seq. *Bioinformatics* **25**, 1105-1111 (2009).
- 496 38 Anders, S., Pyl, P. T. & Huber, W. HTSeq-A Python framework to work with  
497 high-throughput sequencing data. *Bioinformatics*, btu638 (2014).
- 498 39 Trapnell, C. *et al.* Differential gene and transcript expression analysis of RNA-seq  
499 experiments with TopHat and Cufflinks. *Nat. Protoc.* **7**, 562-578 (2012).
- 500 40 Glass, J. I. *et al.* Essential genes of a minimal bacterium. *Proc. Natl. Acad. Sci. U.S.A.*  
501 **103**, 425-430, doi:10.1073/pnas.0510013103 (2006).
- 502 41 Yonemaru, J. I. *et al.* Q-TARO: QTL annotation rice online database. *Rice* **3**, 194-203  
503 (2010).
- 504 42 Radivojac, P. *et al.* A large-scale evaluation of computational protein function prediction.  
505 *Nat. Methods* **10**, 221-227 (2013).
- 506 43 Palaniswamy, S. K. *et al.* AGRIS and AtRegNet. a platform to link cis-regulatory  
507 elements and transcription factors into regulatory networks. *Plant physiology* **140**,  
508 818-829 (2006).
- 509 44 Higo, K., Ugawa, Y., Iwamoto, M. & Korenaga, T. Plant cis-acting regulatory DNA  
510 elements (PLACE) database: 1999. *Nucleic acids research* **27**, 297-300 (1999).
- 511 45 Schäfer, J. & Strimmer, K. A shrinkage approach to large-scale covariance matrix  
512 estimation and implications for functional genomics. *Stat.Appl.Genet.Mol.* **4**, 32 (2005b).
- 513 46 Schäfer, J. & Strimmer, K. An empirical Bayes approach to inferring large-scale gene  
514 association networks. *Bioinformatics* **21**, 754-764 (2005a).
- 515 47 Li, L., Stoeckert, C. J. & Roos, D. S. OrthoMCL: identification of ortholog groups for  
516 eukaryotic genomes. *Genome Res.* **13**, 2178-2189 (2003).
- 517 48 Ficklin, S. P., Luo, F. & Feltus, F. A. The association of multiple interacting genes with  
518 specific phenotypes in rice using gene coexpression networks. *Plant Physiology* **154**,  
519 13-24 (2010).
- 520 49 Supek, F., Bošnjak, M., Škunca, N. & Šmuc, T. REVIGO summarizes and visualizes long  
521 lists of gene ontology terms. *PLoS One* **6**, e21800 (2011).
- 522

## 523 Figure Legends

524 **Fig.1** Co-expression modules related to the pollen development. A, Module #8, pollen-specific; B, Module #12,  
525 pollen-specific. The heatmap was produced by the VST dataset. In the heatmap, each row represents a sample, and  
526 each column represents a gene. The gene expression value was indicated by the color. The different colors of color  
527 bar on the right side represent the different types of tissues

528 **Fig.2** The synergistic regulation of Module #5 by multi-factors. Brown nodes indicate transcription factors; Green  
529 nodes denote miRNA; Pink nodes represent the genes involving in cell cycle, flower development or other  
530 development processes; Grey nodes indicate that the genes are function unknown or annotated with irrelevant  
531 functions; Triangle nodes denote the genes containing the known consensus motif of WTSSCSS related to cell  
532 cycle. The size of node is proportional to the number of connected genes. For demonstration purpose, for except  
533 the co-expression links related to transcription factors (brown nodes)/miRNA (green nodes), we only showed the  
534 connections with confidence score larger than 0.2.

535 **Fig.3** Number distributions of the conserved co-expression links between different plants at different proportion of  
536 co-expression links ranked by the confidence score

537 **Fig.4** Histogram for the number of functional modules with a given fraction of genes possessing a homolog.  
538 Random module represents the random control distribution (preserving the same module size). A) *Arabidopsis* vs  
539 rice; B) *Arabidopsis* vs maize; C) *Arabidopsis* vs soybean; D) rice vs *Arabidopsis*; E) rice vs maize; F) rice vs  
540 soybean; G) maize vs *Arabidopsis*; H) maize vs rice; I) maize vs soybean; J) soybean vs *Arabidopsis*; K) soybean  
541 vs rice; L) soybean vs maize

542 **Fig.5** The common enriched GO terms of the functional modules within the conserved modules projected on the  
543 semantic space. The size of circle represents the gene number of GO term, and the color code indicates statistical  
544 significance

## 545 Table Legends

546 **Table 1** The representative results of enriched transcription factors for the 12 rice  
547 co-expression modules

| Module ID/Function category | Gene ID        | TF family | P-value     |
|-----------------------------|----------------|-----------|-------------|
| 1/stress response           | LOC_Os08g09800 | WRKY      | 6.16078E-94 |
| 1/stress response           | LOC_Os08g09810 | WRKY      | 1.22075E-89 |
| 1/stress response           | LOC_Os02g15340 | NAC       | 1.00472E-24 |
| 1/stress response           | LOC_Os04g44670 | ERF       | 1.51304E-23 |
| 1/stress response           | LOC_Os04g43560 | NAC       | 2.43893E-22 |
| 1/stress response           | LOC_Os11g47460 | MYB       | 2.64376E-66 |
| 1/stress response           | LOC_Os09g26170 | MYB       | 3.28823E-63 |
| 4/photosynthesis            | LOC_Os04g42020 | CO-like   | 7.87098E-35 |
| 4/photosynthesis            | LOC_Os09g06464 | CO-like   | 1.52885E-08 |
| 5/cell cycle                | LOC_Os11g07460 | TCP       | 4.0215E-72  |
| 5/cell cycle                | LOC_Os03g43730 | CPP       | 9.34839E-50 |
| 5/cell cycle                | LOC_Os02g42380 | TCP       | 1.40099E-44 |
| 5/cell cycle                | LOC_Os02g42950 | YABBY     | 1.32803E-93 |
| 5/cell cycle                | LOC_Os01g52680 | MIKC      | 2.45616E-84 |
| 5/cell cycle                | LOC_Os07g32170 | SBP       | 8.16666E-84 |
| 5/cell cycle                | LOC_Os06g44860 | SBP       | 2.70844E-57 |
| 5/cell cycle                | LOC_Os02g08070 | SBP       | 3.34117E-39 |
| 5/cell cycle                | LOC_Os08g39890 | SBP       | 3.94972E-38 |
| 5/cell cycle                | LOC_Os09g31438 | SBP       | 1.62399E-28 |
| 5/cell cycle                | LOC_Os06g06750 | MIKC      | 6.26973E-23 |
| 7/photosynthesis            | LOC_Os04g41560 | DBB       | 1.47199E-55 |
| 7/photosynthesis            | LOC_Os06g24070 | G2-like   | 0.002653096 |
| 7/photosynthesis            | LOC_Os06g44450 | CO-like   | 1.34414E-14 |
| 9/photosynthesis            | LOC_Os07g48596 | G2-like   | 0.001566656 |
| 10/cell cycle               | LOC_Os06g13670 | E2F/DP    | 2.16361E-13 |

|                    |                |         |             |
|--------------------|----------------|---------|-------------|
| 10/cell cycle      | LOC_Os02g50630 | E2F/DP  | 2.25324E-11 |
| 10/cell cycle      | LOC_Os12g41230 | CPP     | 0.00126451  |
| 13/photosynthesis  | LOC_Os02g39360 | DBB     | 0.002057518 |
| 13/photosynthesis  | LOC_Os12g01490 | G2-like | 4.90549E-15 |
| 13/photosynthesis  | LOC_Os06g15330 | CO-like | 4.51511E-21 |
| 13/photosynthesis  | LOC_Os02g39710 | CO-like | 2.35714E-08 |
| 15/stress response | LOC_Os07g22730 | ERF     | 1.37837E-42 |
| 15/stress response | LOC_Os10g33810 | MYB     | 2.46562E-13 |

548 **Table 2** The representative results of enriched known *cis*-regulatory motifs for the 12  
549 rice co-expression modules

| Module ID/Function category | Motif sequence | Motif name      | P-value  |
|-----------------------------|----------------|-----------------|----------|
| 1/stress response           | TTGAC          | WBOXATNPR1      | 1.03E-07 |
| 1/stress response           | WAACCA         | MYBIAT          | 2.16E-06 |
| 4/photosynthesis            | GCCAC          | SORLIP1AT       | 2.46E-06 |
| 4/photosynthesis            | CACGTG         | CACGTGMOTIF     | 3.21E-03 |
| 4/photosynthesis            | AACCAA         | REALPHALGLHCB21 | 6.12E-06 |
| 4/photosynthesis            | ACGTGGCA       | LRENPCABE       | 3.39E-03 |
| 5/cell cycle                | WTTSSCSS       | E2FCONSENSUS    | 1.28E-02 |
| 7/photosynthesis            | GCCAC          | SORLIP1AT       | 2.91E-11 |
| 7/photosynthesis            | AGCCAC         | SORLIP1         | 3.68E-11 |
| 7/photosynthesis            | MCACGTGGC      | GBOXLERBCS      | 1.02E-04 |
| 7/photosynthesis            | ACGTGGC        | BOXIIPCCHS      | 1.12E-04 |
| 8/pollen specific           | TTTCCCGC       | E2FANTRNR       | 6.75E-03 |
| 8/pollen specific           | WTTSSCSS       | E2FCONSENSUS    | 9.78E-03 |
| 8/pollen specific           | TYTCCCGCC      | E2FAT           | 2.25E-02 |
| 9/photosynthesis            | GATAAG         | IBOX            | 3.87E-07 |
| 9/photosynthesis            | GATAA          | IBOXCORE        | 3.61E-06 |
| 9/photosynthesis            | AAAATATCT      | EVENINGAT       | 3.61E-06 |
| 9/photosynthesis            | GATAAGR        | IBOXCORENT      | 6.60E-06 |
| 10/cell cycle               | TYTCCCGCC      | E2FAT           | 3.83E-07 |
| 10/cell cycle               | GCGGGAAA       | E2F1OSPCNA      | 4.18E-06 |
| 10/cell cycle               | TTTCCCGC       | E2FANTRNR       | 7.75E-06 |
| 12/pollen specific          | TTTCCCGC       | E2FANTRNR       | 1.64E-04 |
| 12/pollen specific          | TYTCCCGCC      | E2FAT           | 2.04E-04 |
| 13/photosynthesis           | GRWAAW         | GT1CONSENSUS    | 1.80E-03 |
| 13/photosynthesis           | AAAATATCT      | EVENINGAT       | 3.68E-03 |
| 13/photosynthesis           | CAAAACGC       | CDA1ATCAB2      | 7.51E-03 |
| 13/photosynthesis           | GATAAGR        | IBOXCORENT      | 1.79E-02 |
| 13/photosynthesis           | GATAAG         | IBOX            | 1.32E-02 |
| 15/stress response          | TTGACC         | ELRECOREPCR1    | 2.10E-04 |
| 17/photosynthesis           | ATAGAA         | BOXIINTPATPB    | 5.26E-09 |
| 17/photosynthesis           | TATTCT         | -10PEHVPSBD     | 4.71E-06 |



|                   |          |                   |          |
|-------------------|----------|-------------------|----------|
| 17/photosynthesis | GNATATNC | P1BS              | 2.13E-02 |
| 17/photosynthesis | YTCANTYY | INRNTPSADB        | 2.94E-04 |
| 17/photosynthesis | ATACGTGT | ZDNAFORMINGATCAB1 | 5.46E-04 |

550 **Table 3** The statistic table of agronomic traits whose genes were enriched in modules

| Module ID | Agronomic trait                          | # of agronomic trait genes contained in module | # of all agronomic trait genes contained in module | Enrichment fold | p-value  |
|-----------|------------------------------------------|------------------------------------------------|----------------------------------------------------|-----------------|----------|
| 1         | Other soil stress tolerance <sup>a</sup> | 19                                             | 30                                                 | 5.36            | 1.44E-06 |
| 5         | Dwarf <sup>a</sup>                       | 15                                             | 30                                                 | 1.97            | 1.22E-02 |
| 6         | Drought tolerance <sup>a</sup>           | 6                                              | 29                                                 | 4.97            | 7.24E-08 |
| 6         | Salinity tolerance <sup>a</sup>          | 13                                             | 29                                                 | 4.71            | 1.52E-06 |
| 6         | Cold tolerance <sup>a</sup>              | 12                                             | 29                                                 | 6.39            | 4.10E-05 |
| 7         | Source activity <sup>a</sup>             | 9                                              | 30                                                 | 7.01            | 1.38E-12 |
| 10        | Sterility <sup>a</sup>                   | 8                                              | 16                                                 | 3.41            | 5.92E-03 |
| 30        | Panicle flower <sup>a</sup>              | 6                                              | 13                                                 | 5.04            | 9.33E-06 |
| 33        | Eating quality <sup>a</sup>              | 12                                             | 7                                                  | 14.08           | 4.55E-07 |

551 <sup>a</sup> represents the agronomic traits extracted from Q-TARO database and literatures

## 552 **Acknowledgements**

553 This work is financially supported by The Strategic Priority Research Program of the  
554 Chinese Academy of Sciences (Grant No. XDA08020302). The funders had no role  
555 in study design, data collection and analysis, decision to publish, or preparation of the  
556 manuscript.

## 557 **Author Contributions**

558 H.Y. conceived the original screening and research plans; H.Y. and C.Z.L. supervised  
559 the experiments; H.Y. performed the experiments and analyzed the data; B.K.J  
560 revised the paper; H.Y. conceived the project and wrote the article with contributions  
561 of all the authors; H.Y and C.Z.L supervised and complemented the writing.

## 562 **Additional Information**

563 **Competing financial interests:** The authors declare no competing financial interests.

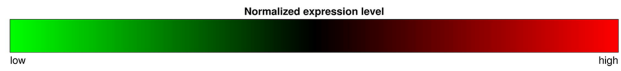

A

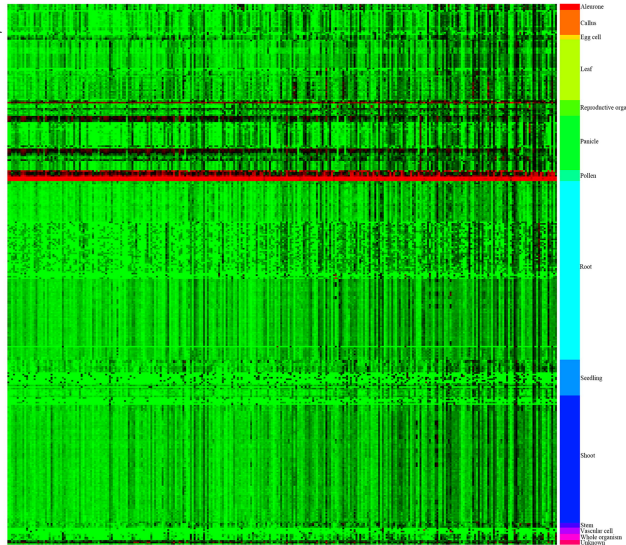

B

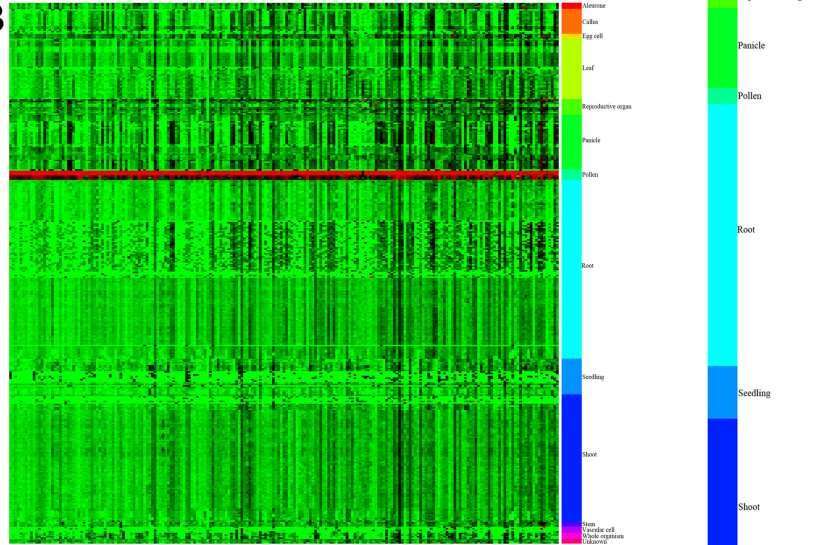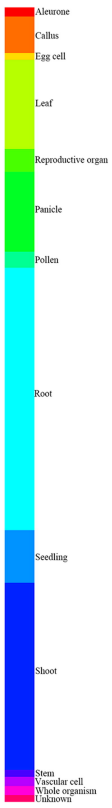



**A**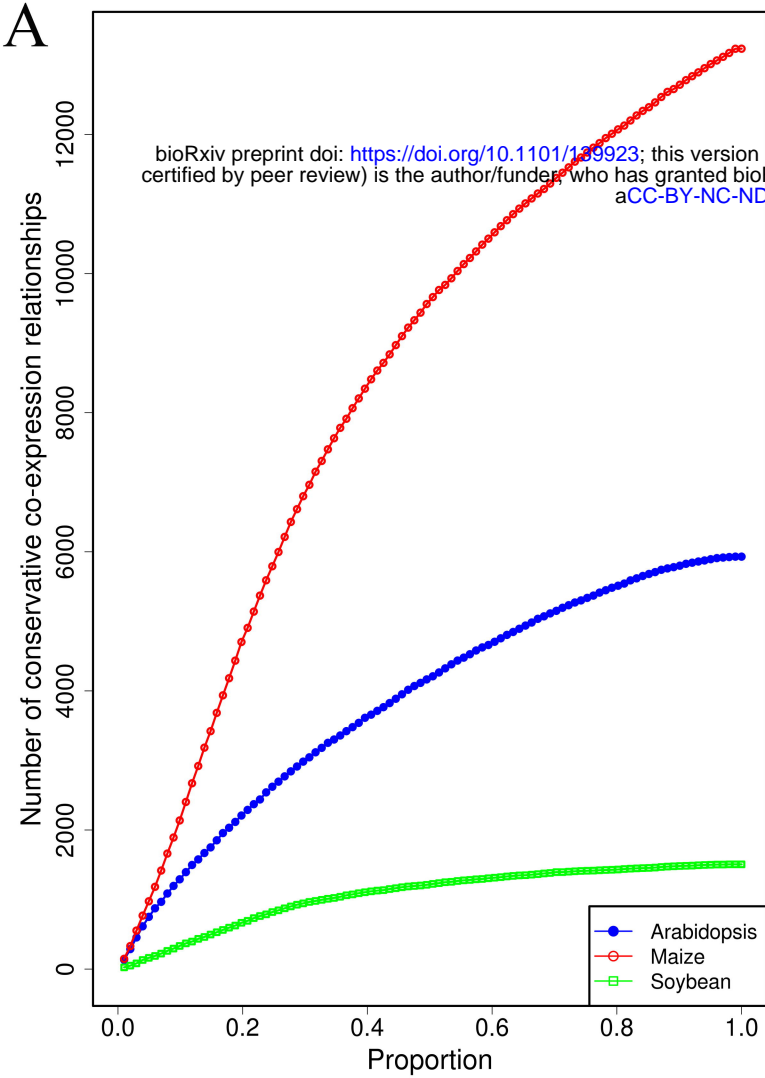**B**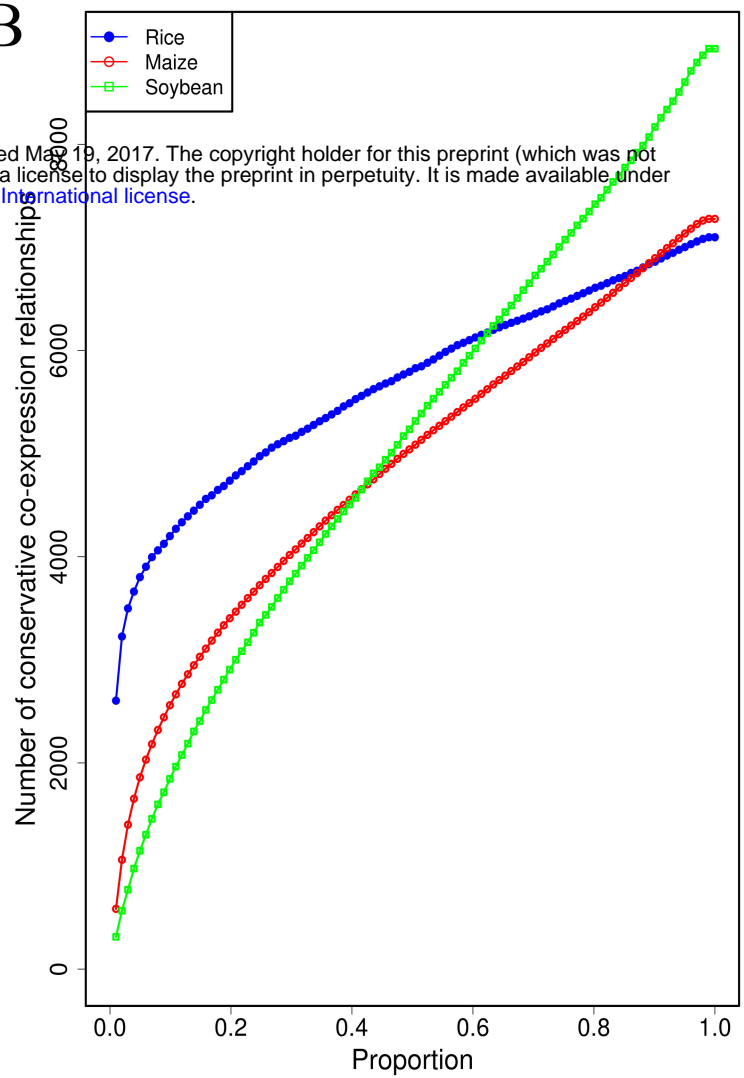**C**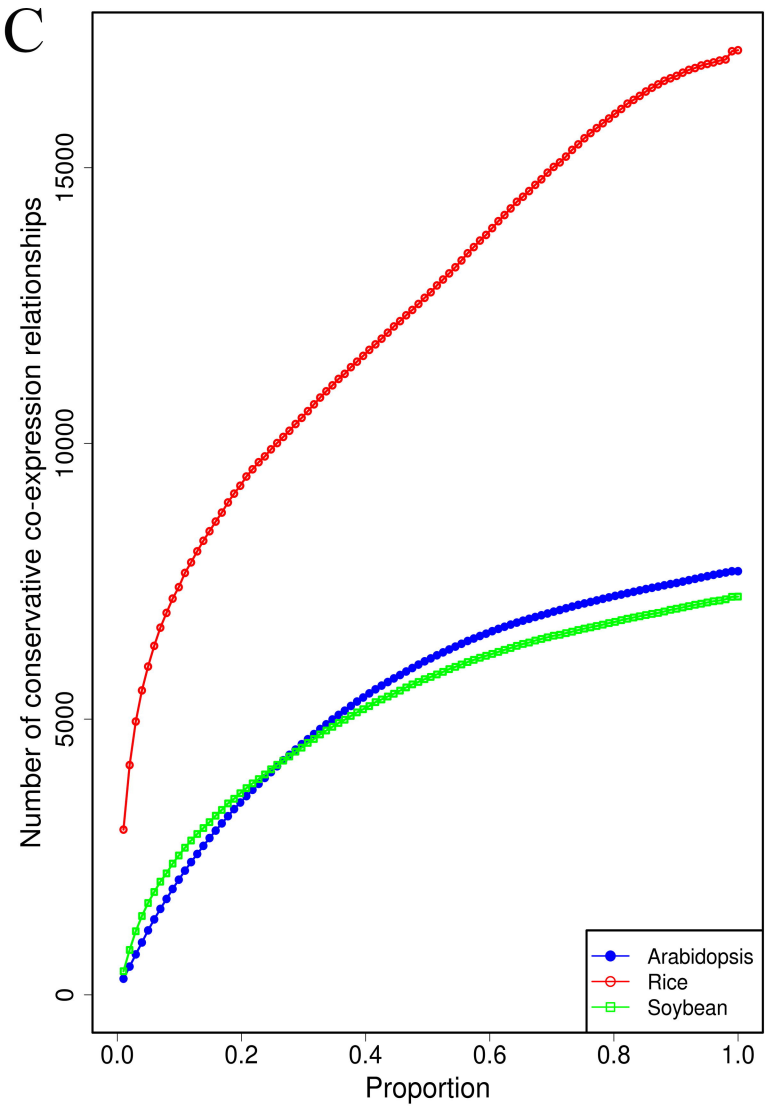**D**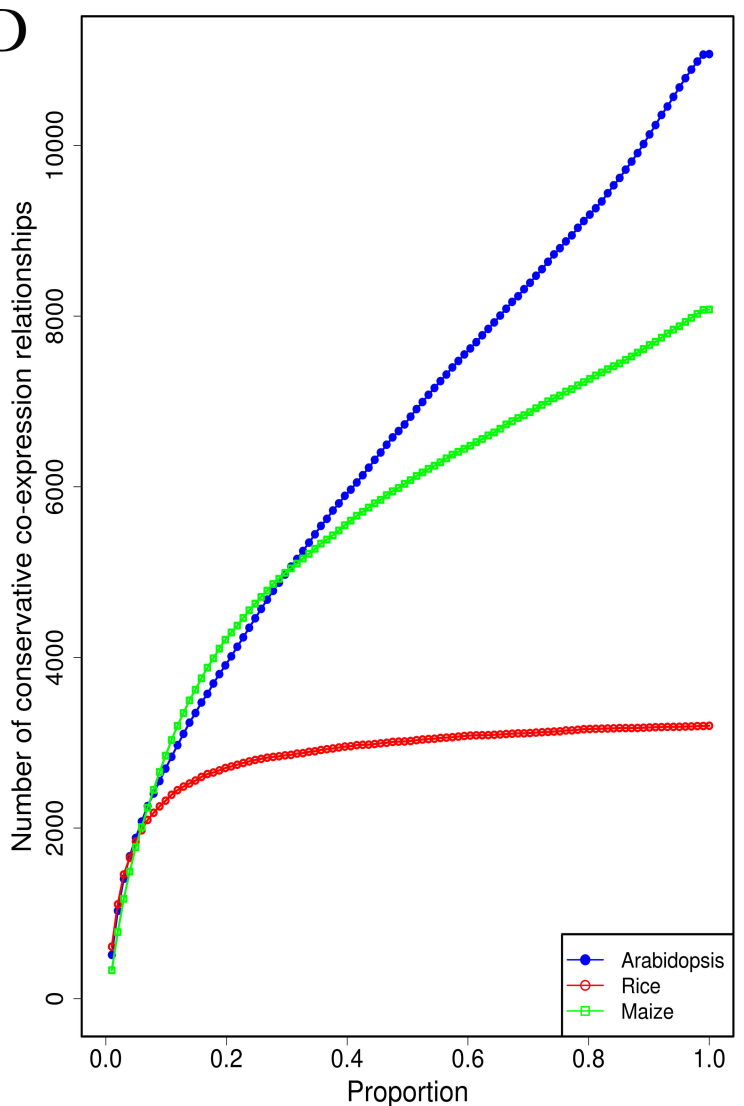

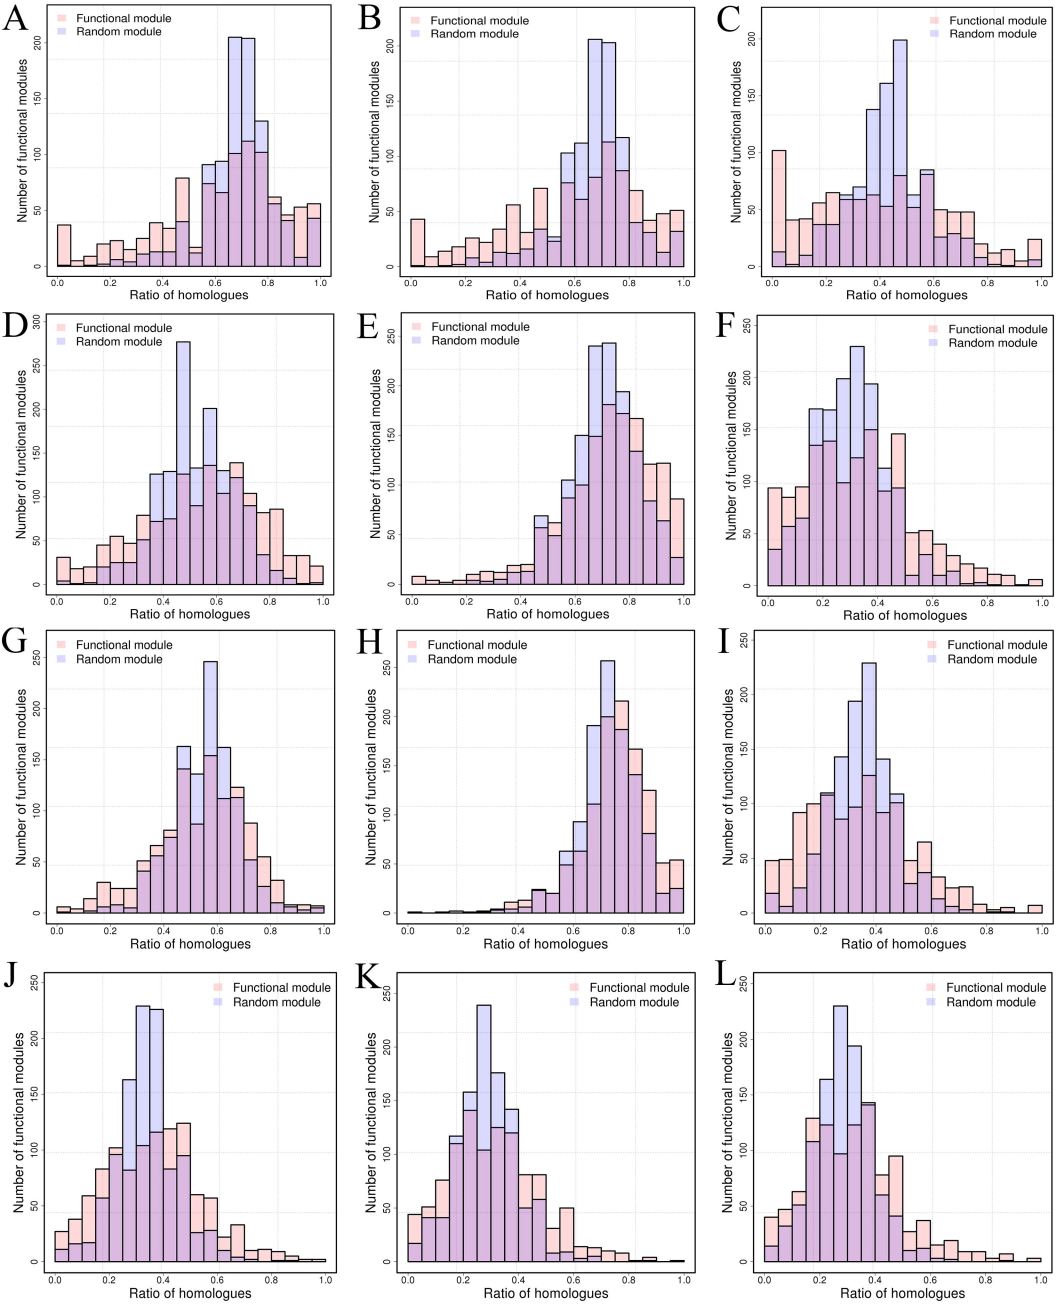

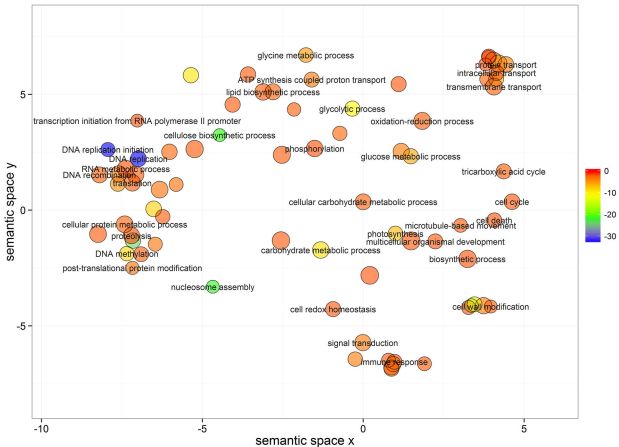

Source: http://www.biorxiv.org/content/10.1101/139923v1.full.pdf
